# Supplementary material
Source: PubMed Central journal article supplement (PMC3883916)

**Supplementary Figure S1.** Mean (SE) changes in waist circumference, percent trunk fat, fat-free mass, HbA1c, free fatty acids and hsCRP from baseline to 12-month follow-up. \* $p < 0.05$  is for between-group differences at the indicated follow-up time-point. Interaction terms “interventions\*follow-up period” were significant for waist circumference ( $p < 0.001$ ), percent trunk fat ( $p < 0.001$ ) and HbA1c ( $p = 0.006$ ) but did not reach statistical significance for fat-free mass ( $p = 0.354$ ). ■ RYGB surgery ● Diabetes Support and Education

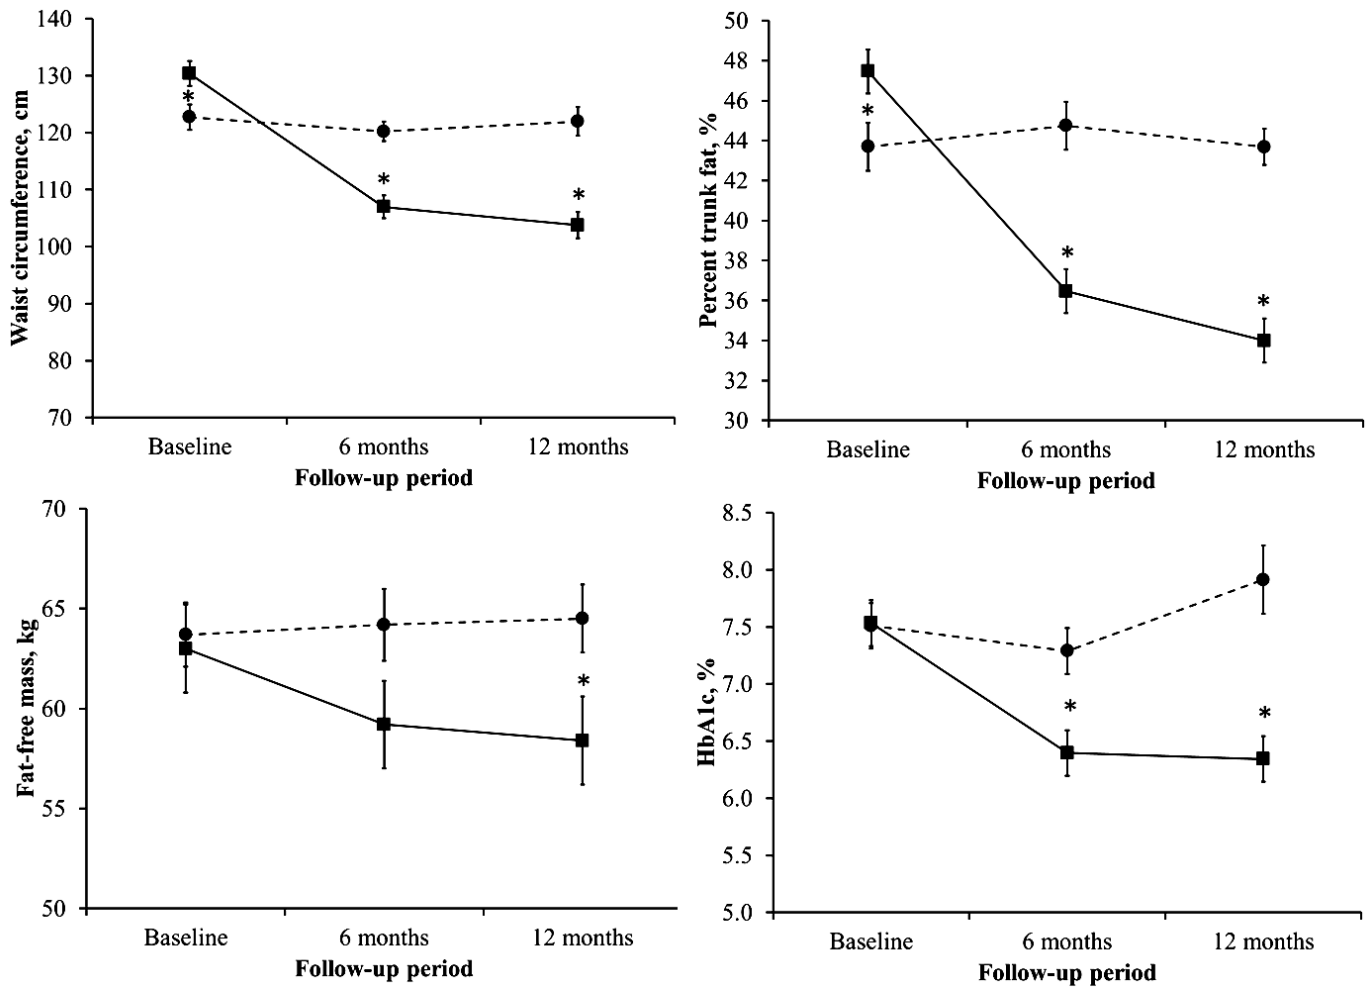

**Supplemental Figure S2.** Mean changes in the plasma glucose during frequently sampled intravenous glucose tolerance test from baseline to 12-month follow-up. The changes in the plasma glucose was significant for follow-up period in the RYGB group only ( $p < 0.001$ ).

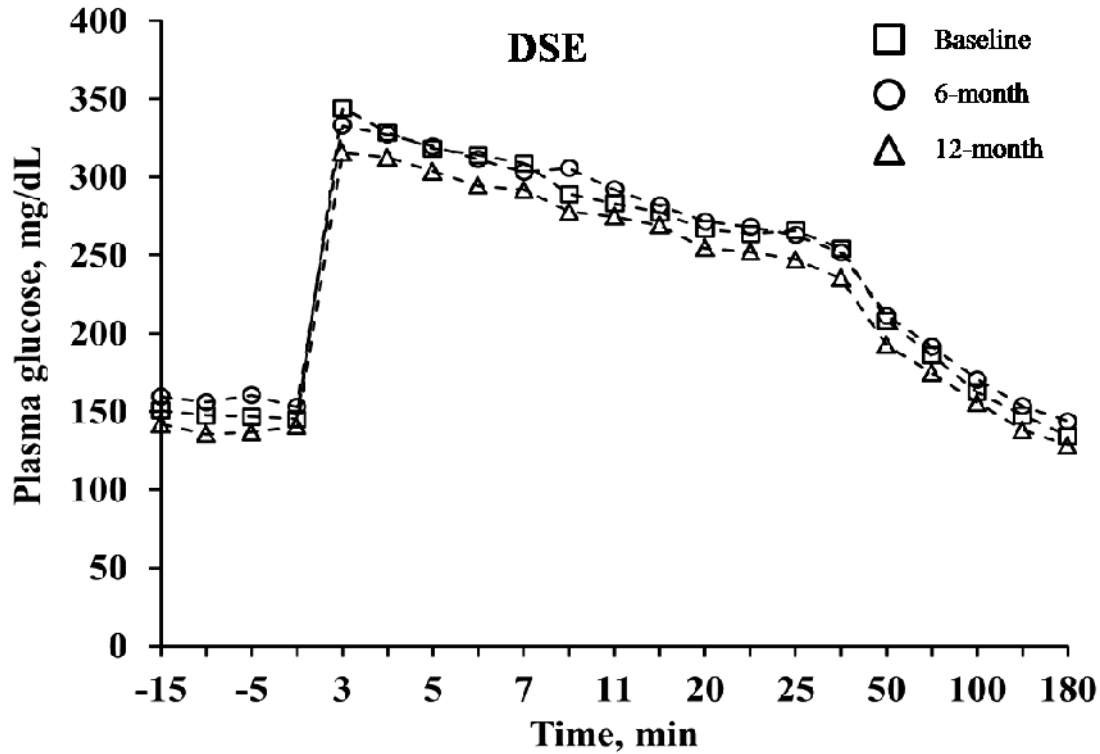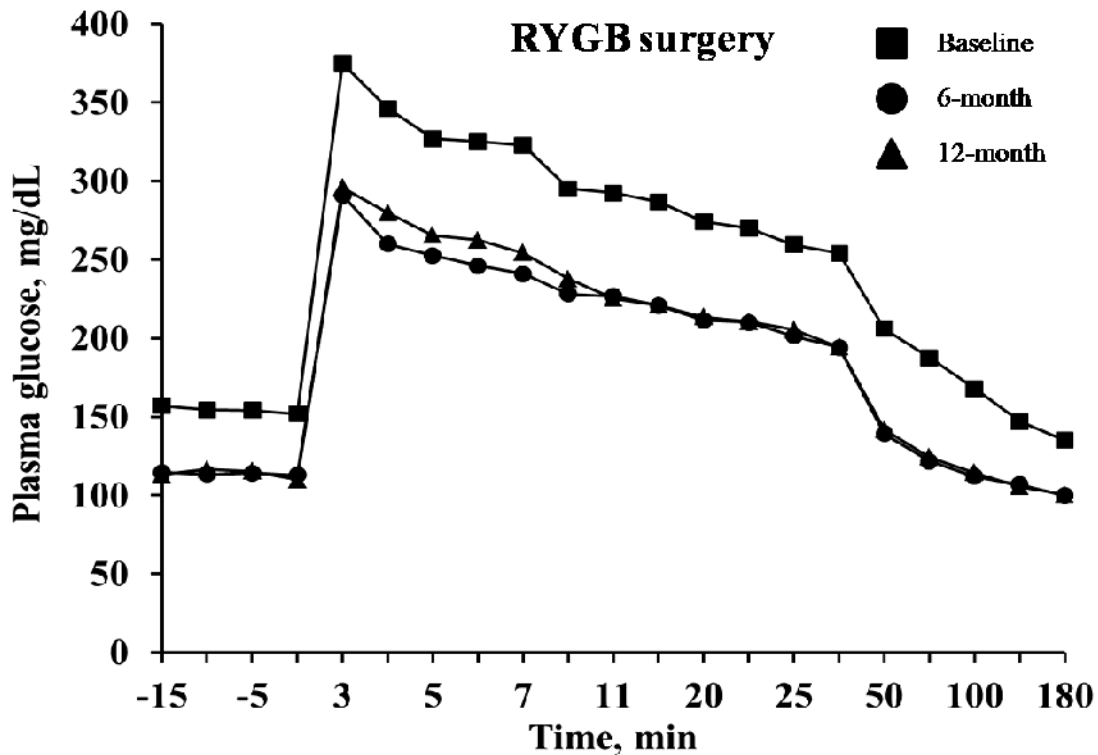

Supplement: NIHMS475424-supplement-01.pdf [file NIHMS475424-supplement-01.pdf]
